# Supplementary material for: Robust poleward jet shifts in idealised baroclinic-wave life-cycle experiments with noisy initial conditions
Source: Copernicus journal article supplement (doi:10.5194/wcd-4-49-2023), 2023-01-12
Supplement: Supplementary file 1 [file wcd-4-49-2023-supplement.pdf]

Supplement of Weather Clim. Dynam., 4, 49–60, 2023  
<https://doi.org/10.5194/wcd-4-49-2023-supplement>  
© Author(s) 2023. CC BY 4.0 License.

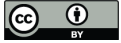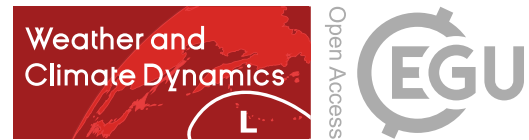

*Supplement of*

## **Robust poleward jet shifts in idealised baroclinic-wave life-cycle experiments with noisy initial conditions**

**Felix Jäger et al.**

*Correspondence to:* Philip Rupp ([philip.rupp@lmu.de](mailto:philip.rupp@lmu.de))

The copyright of individual parts of the supplement might differ from the article licence.

## Supplement

Further supplementary material (DOI: 10.5282/ubm/data.301) can be found within the assets to this paper, containing video animations of the evolution of EKE, MKE and PV for different cases with LC1 and LC2 initial conditions and varying values of the initial noise strength  $\eta$ .

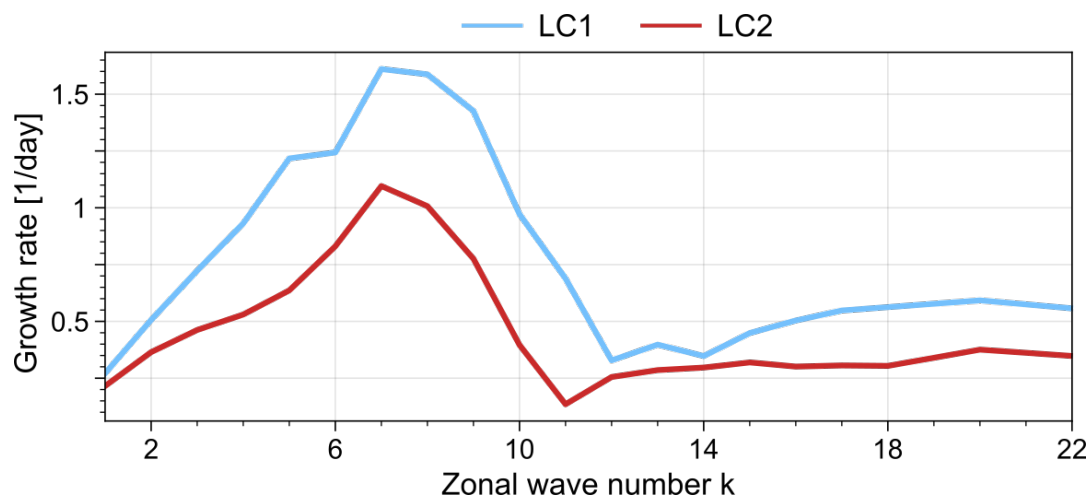

**Figure S1.** Growth rates of EKE for simulations with LC1 or LC2 initial conditions ( $\eta = 0$ ) and perturbations with varying specified single zonal wave number  $k$ . Growth rates have been estimated as the slope of a linear fit of the logarithmic EKE during the initial phase up to the time of the first local maximum in EKE.

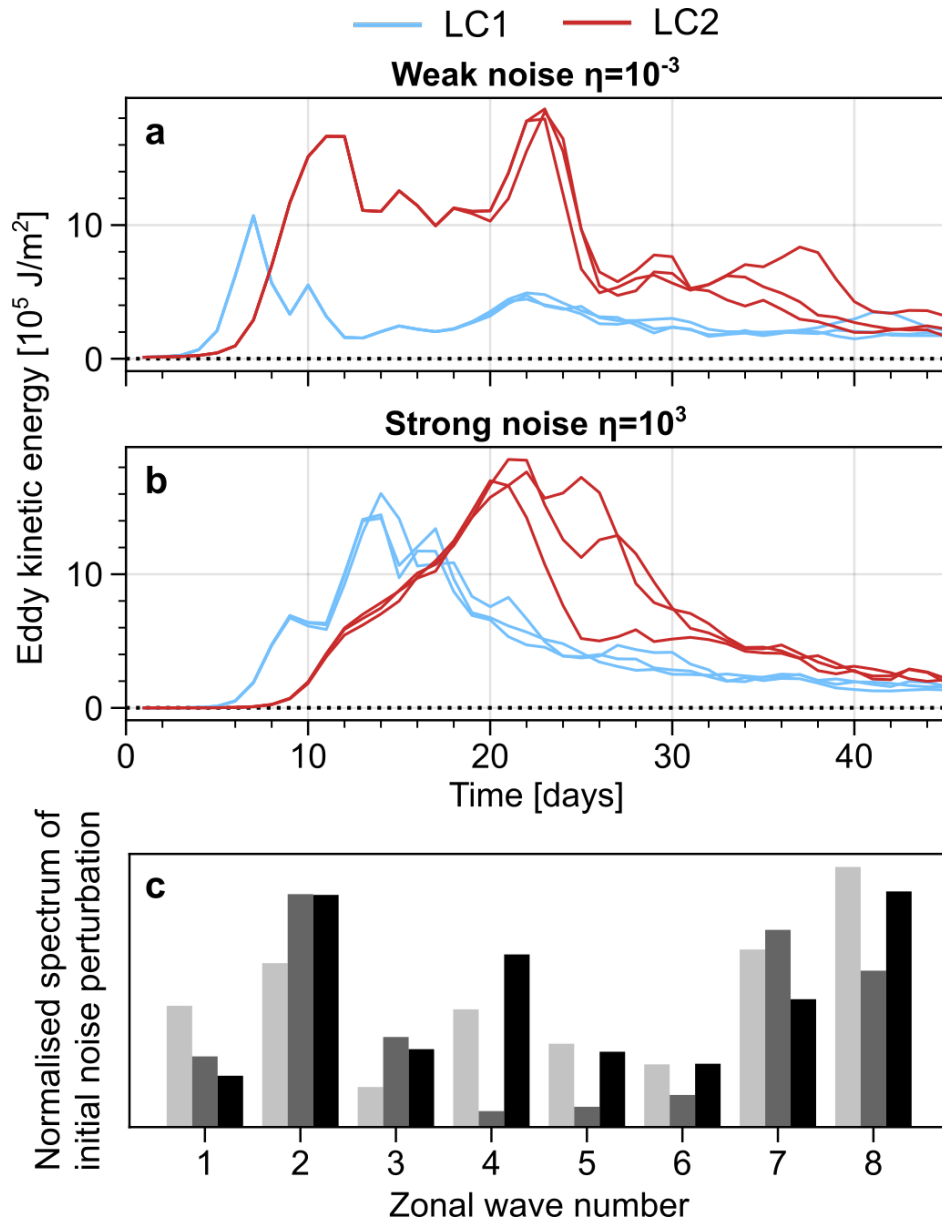

**Figure S2.** Eddy kinetic energy evolution in simulations with weak (a) and strong (b) initial noise perturbations. For each initial state configuration (LC1 and LC2), the evolution of three ensemble members with different noise realisations is shown. The normalised zonal wave spectrum of the corresponding three noise realisations is given in panel (c), with each shading of grey depicting a different realisation.
